# Supplementary material for: Disassembly of self-assembling peptide hydrogels as a versatile method for cell extraction and manipulation
Source: Royal Society of Chemistry journal article supplement (doi:10.1039/d4tb01575d), 2024-01-01
Supplement: d4tb01575d1.pdf [file d4tb01575d1.pdf]

## Supplementary Information

### Disassembly of Self-Assembling Peptide Hydrogels as a Versatile Method for Cell Extraction and Manipulation

Cosimo Ligorio<sup>1,2,3</sup>, Magda Martinez-Espuga<sup>1,2</sup>, Domenico Laurenza<sup>1,2</sup>, Alex Hartley<sup>1,2</sup>, Chloe B. Rodgers<sup>4</sup>, Anna M. Kotowska<sup>2</sup>, David J. Scurr<sup>2</sup>, Matthew J. Dalby<sup>4</sup>, Paloma Ordóñez-Morán<sup>5</sup>, Alvaro Mata<sup>1,2,3\*</sup>

Affiliations:

<sup>1</sup>Biodiscovery Institute, University of Nottingham, Nottingham, UK

<sup>2</sup>School of Pharmacy, University of Nottingham, Nottingham, UK

<sup>3</sup>Department of Chemical and Environmental Engineering, University of Nottingham, Nottingham, UK

<sup>4</sup>Centre for the Cellular Microenvironment, School of Molecular Biosciences, College of Medical, Veterinary and Life Sciences, Mazumdar-Shaw Advanced Research Centre, University of Glasgow, Glasgow G11 6EW, UK

<sup>5</sup>Translational Medical Sciences Unit, School of Medicine, Centre for Cancer Sciences, Biodiscovery Institute, University of Nottingham, Nottingham, UK

**Corresponding author:**

**Alvaro Mata**

School of Pharmacy and Department of Chemical and Environmental Engineering,  
University of Nottingham, Nottingham NG7 2RD, UK

Email: [a.mata@nottingham.ac.uk](mailto:a.mata@nottingham.ac.uk)

## Supplementary Figures

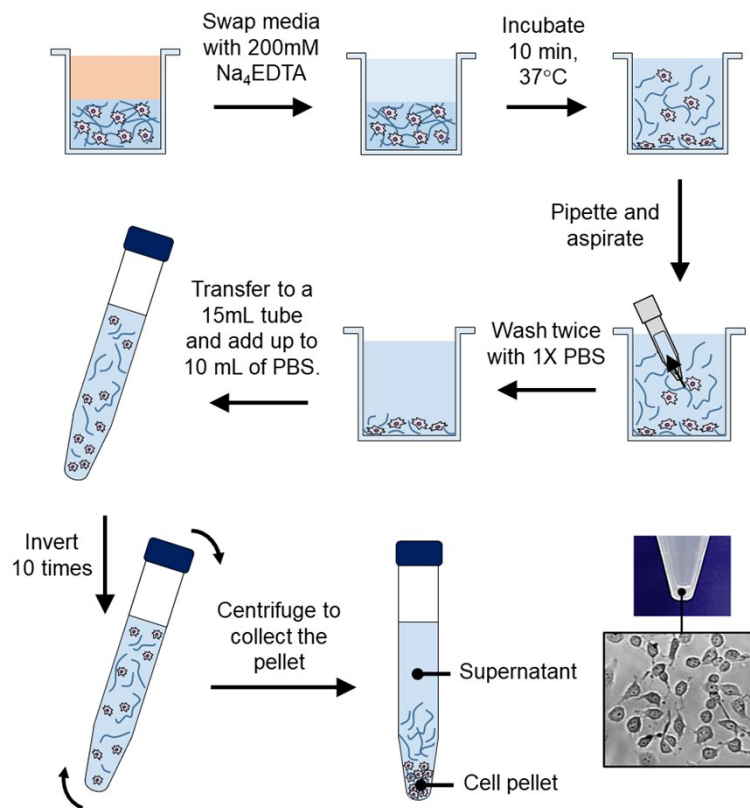

**Figure S1.** Schematics of the disassembly protocol to retrieve cells from 3D PA hydrogels.

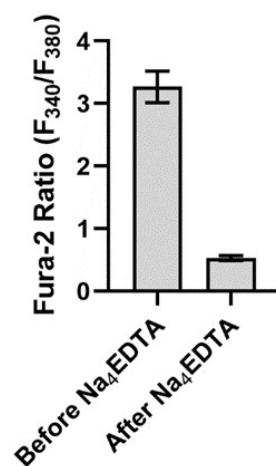

**Figure S2.** Amount of calcium ions present in PA gels before and after addition of Na<sub>4</sub>EDTA.

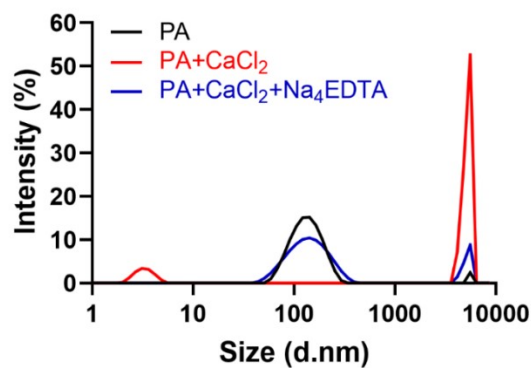

**Figure S3.** Dynamic light scattering shows size distribution of PA nanofibres in solution (black line), as gel (red line) and as solution after effect of  $\text{Na}_4\text{EDTA}$  (blue line).

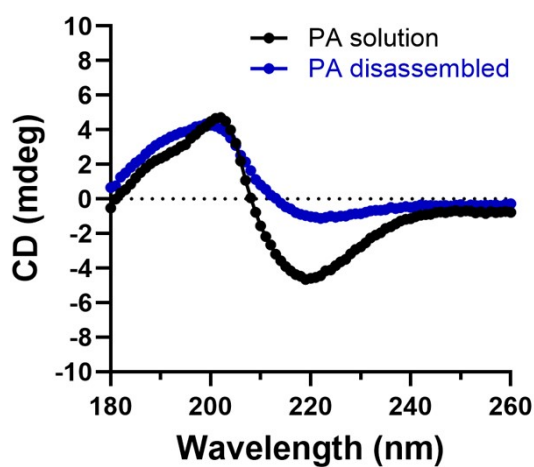

**Figure S4.** Circular dichroism spectra of PA solution (black line) and PA gel disassembled with  $\text{Na}_4\text{EDTA}$  (blue line).

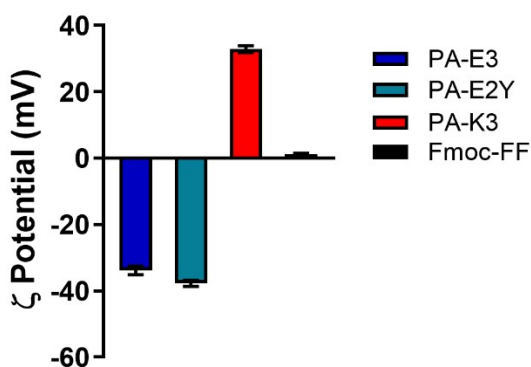

**Figure S5.** Zeta potential values for the negatively-charged (PA-E3, PA-E3Y), positively-charged (PA-K3) and neutral (Fmoc-FF) peptides tested.

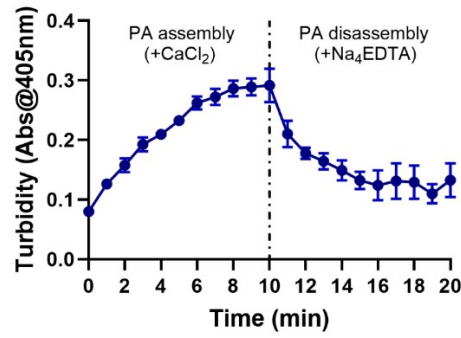

**Figure S6.** Turbidity measurements of PA solution during assembly and disassembly.

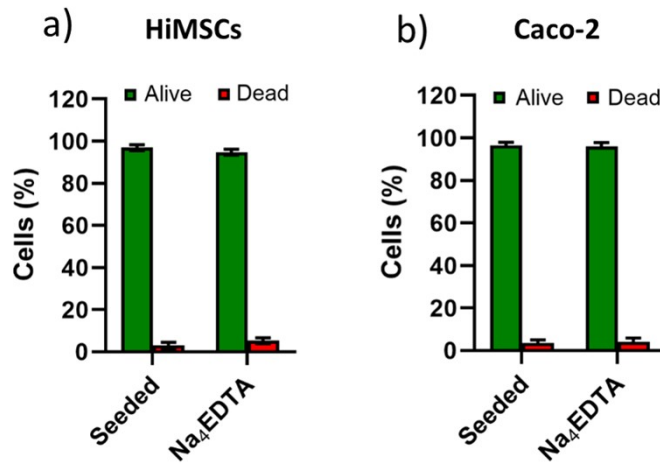

**Figure S7.** Percentages of alive and dead cells before and after PA-E3 hydrogel disassembly by Na<sub>4</sub>EDTA. (a) Cell viability of seeded HiMSCs and extracted HiMSCs. (b) Cell viability of seeded and extracted Caco-2 cells.

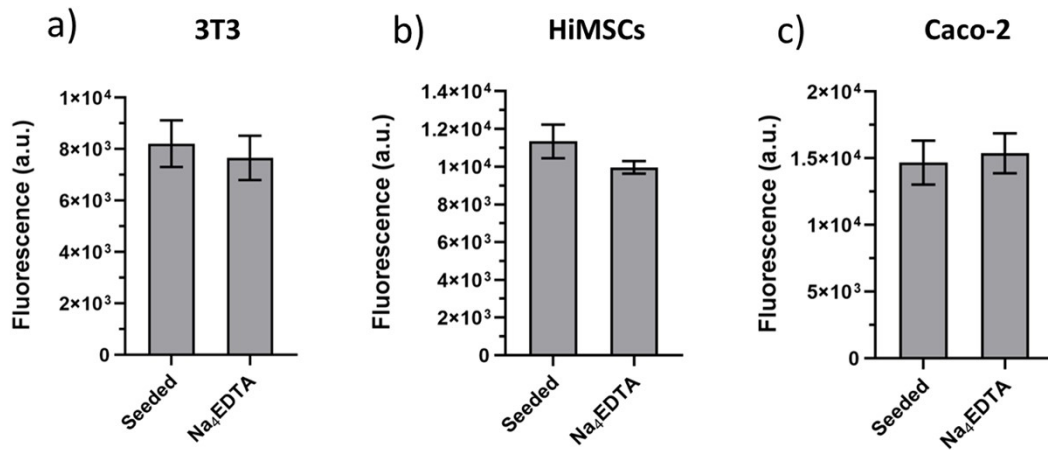

**Figure S8.** Metabolic activity assessed by PrestoBlue assay for (a) 3T3, (b) HiMSCs and (c) Caco-2 cells before and after PA hydrogel disassembly by Na<sub>4</sub>EDTA.

**Table S1.** Primers used for qPCR analysis of CaCo-2 cell gene expression.

| Human gene   | Forward primer          | Reverse Primer         |
|--------------|-------------------------|------------------------|
| <i>ANPEP</i> | CATTATGACACACCCTACCCACT | CTCATGAGCAATCACAGTGACC |
| <i>MUC2</i>  | ACCCGCACTATGTCACCTTC    | GGACAGGACACCTTGTCGTT   |
| <i>CDH1</i>  | GGTGCTGAGGATGAAAAGGGT   | GGCAGTGTCTCTCCAAATCCG  |
| <i>MKi67</i> | AGGGAATGAAAGTGCGTGGA    | GCTTCTGCTTGGGCTTCTTT   |
| <i>GAPDH</i> | GAGTCAACGGATTTGGTCGT    | TTGATTTTGGAGGGATCTCG   |

**Table S2.** Detailed proportions of HSC population after flow cytometry. Average percentages of positive and negative cells (HSC %) were obtained from 4 independent experiments (n=4).

|       | Lineage  |          |       | CD34     |          |       | CD38     |          |       |
|-------|----------|----------|-------|----------|----------|-------|----------|----------|-------|
|       | Positive | Negative | SD    | Positive | Negative | SD    | Positive | Negative | SD    |
| HSC % | 19.05    | 80.95    | ±8.55 | 8.04     | 91.96    | ±4.16 | 1.43     | 98.56    | ±0.28 |
